# Supplementary material for: Multi-Staged Regulation of Lipid Signaling Mediators during Myogenesis by COX-1/2 Pathways
Source: MDPI journal article supplement (doi:10.3390/ijms20184326), 2019-09-04
Supplement: s1 [file s1]

Supplementary Figure Legends:

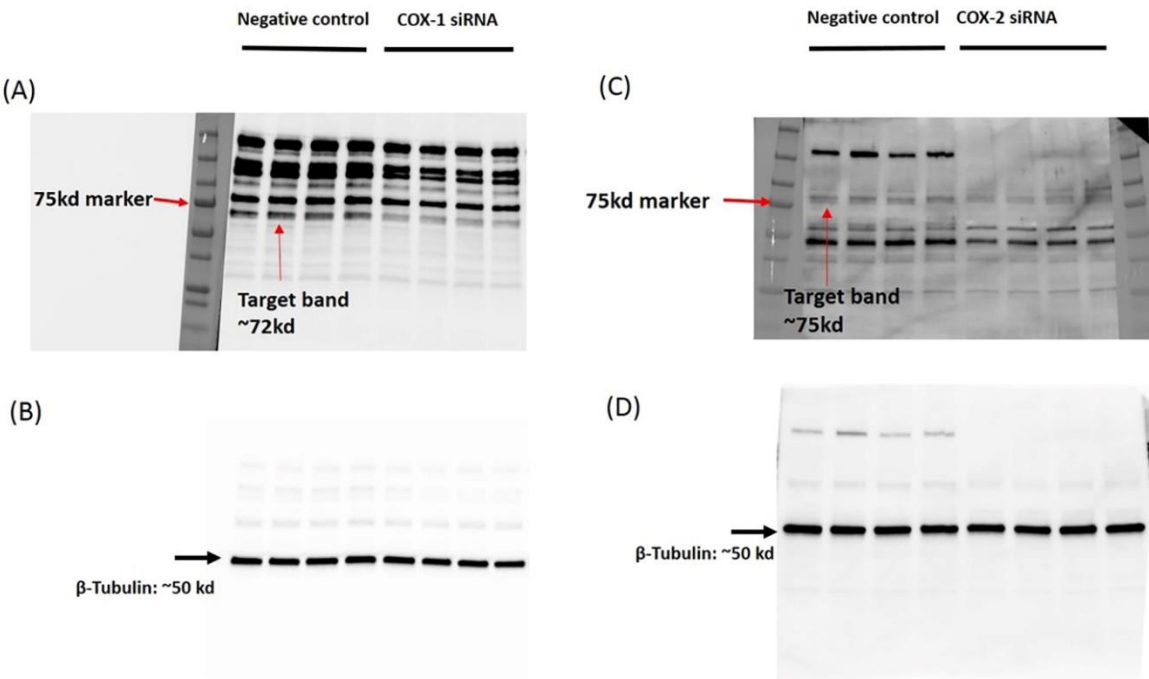

**Figure S1: The completed images of Western blot results.** (A) COX-1 Western blot results and corresponding loading control β-tubulin (B); (C) COX-2 Western blot results and corresponding loading control β-tubulin (D).

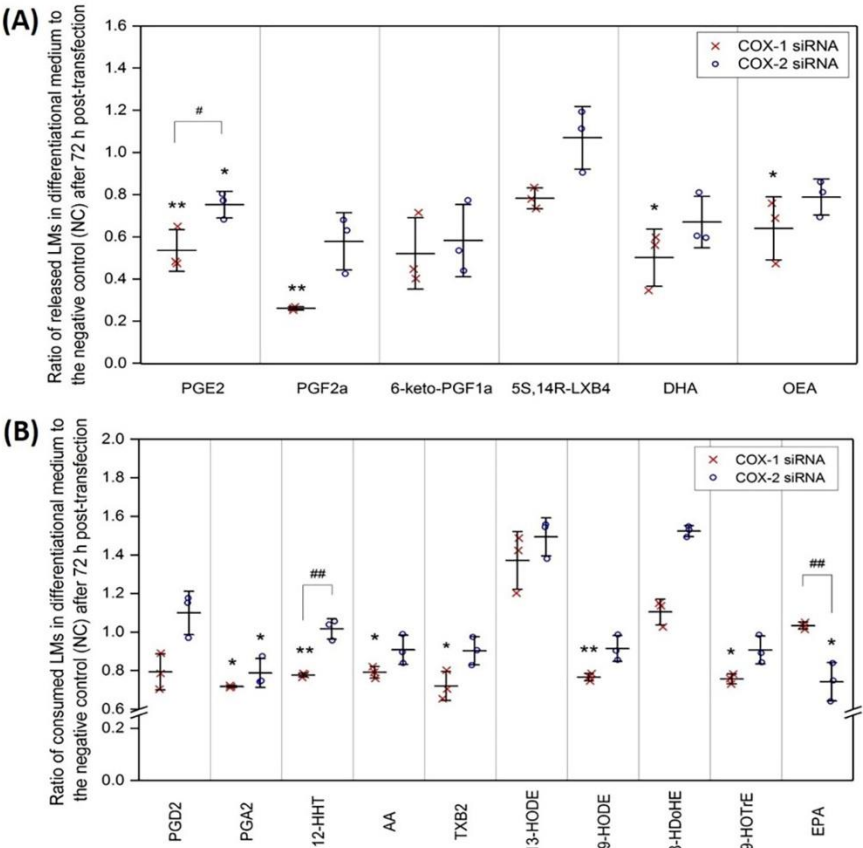

**Figure S2: Results of lipodomic quantification in DM for primary myoblast after COX-1 and -2 knockdown.** (A) LMs released by myocytes/myotubes into DM after 72 h

differentiation; (B) LMs consumed by myocytes/myotubes into DM after 72 h differentiation (concentrations were lower than blank medium after differentiation). n=3, \* $p<0.05$  and \*\* $p<0.01$  compared with negative control; #  $p<0.05$  and ##  $p<0.01$  compared with COX-1 siRNA.

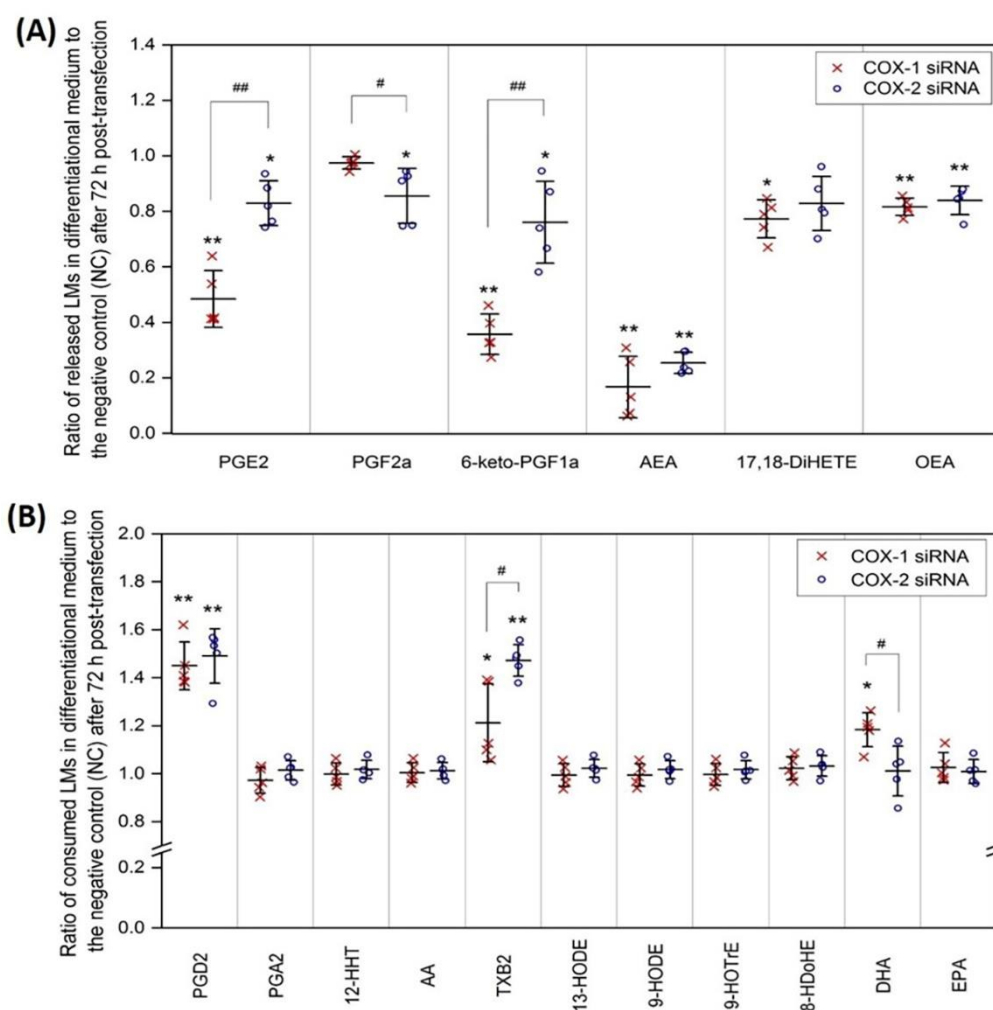

**Figure S3: COX-1 and -2 knockdown leads to specific changes in LMs in DM of C2C12 culture.** (A) LMs released by C2C12 cells/myotubes into DM after 72 h differentiation; (B) LMs consumed by C2C12 cells/myotubes into DM after 72 h differentiation (concentrations were lower than blank medium after differentiation). n=5, \* $p<0.05$  and \*\* $p<0.01$  compared with negative control; #  $p<0.05$  and ##  $p<0.01$  compared with COX-1 siRNA.

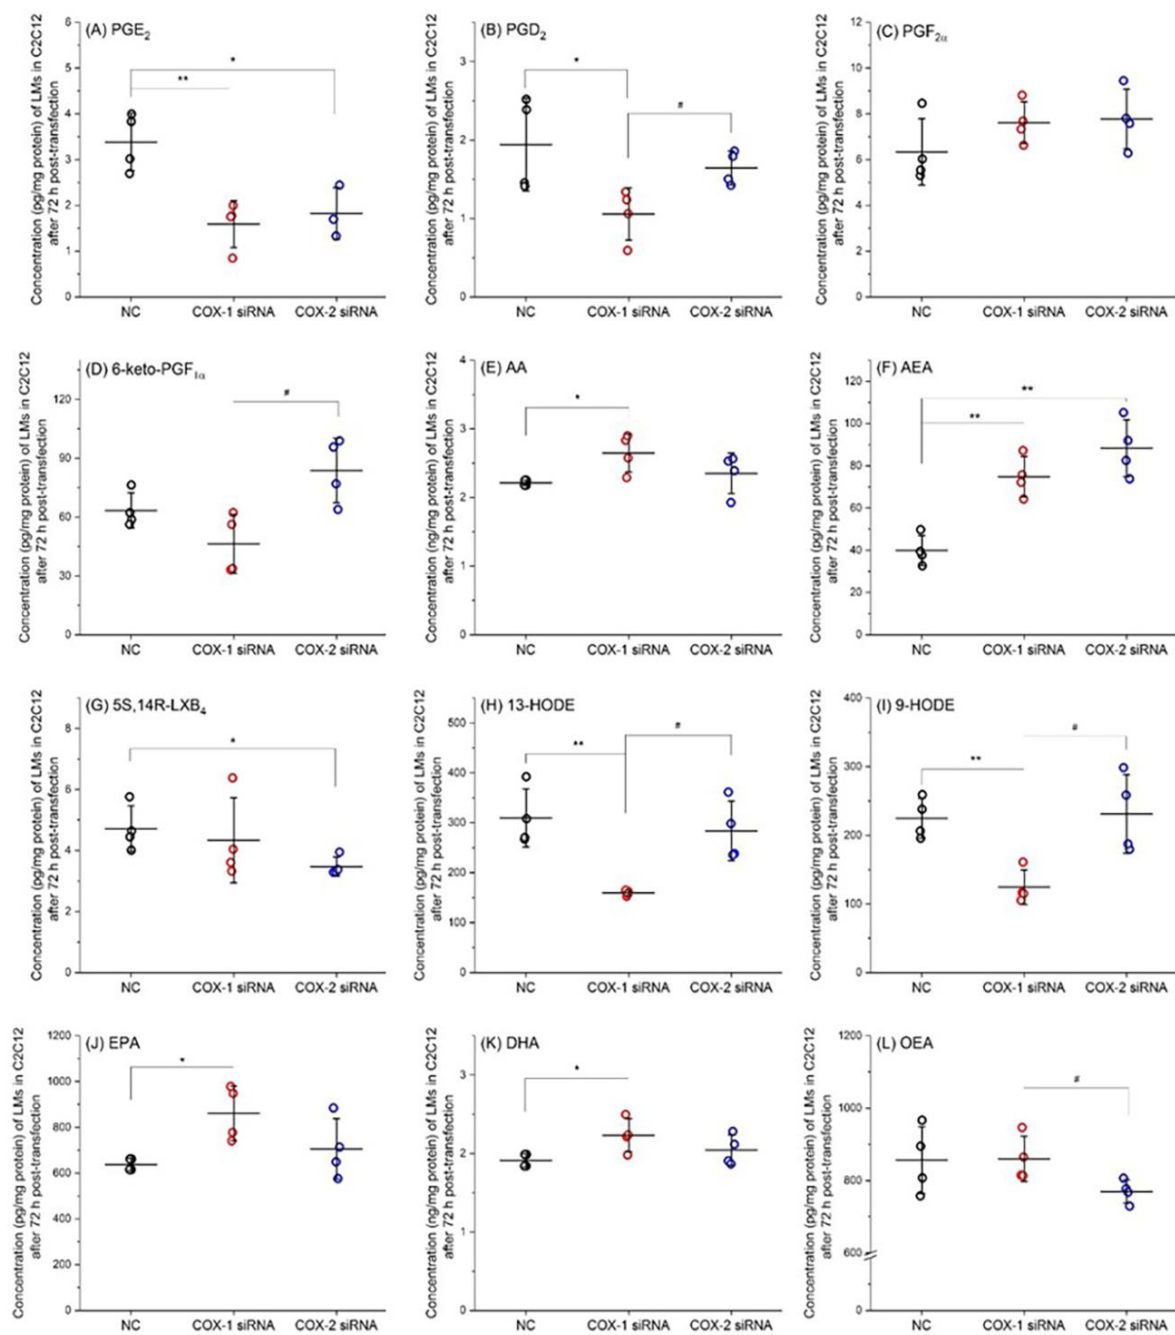

**Figure S4: COX-1 and -2 knockdown leads to specific changes in LMs in C2C12 muscle cells.** n=4, \* $p<0.05$  and \*\* $p<0.01$  compared with NC; #  $p<0.05$  compared with COX-1 siRNA.
